# Supplementary material for: A benzodiazepine activator locks Kv7.1 channels open by electro-mechanical uncoupling
Source: PubMed Central journal article supplement (PMC8976019; doi:10.1038/s42003-022-03229-8), 2022-04-01
Supplement: 42003_2022_3229_MOESM2_ESM.pdf [file 42003_2022_3229_MOESM2_ESM.pdf]

## Supplementary Information

### A Benzodiazepine Activator Locks K<sub>v</sub>7.1 Channels Open by Electro-Mechanical Uncoupling

Running title: RL3 Binding and Activation

Julian A. Schreiber<sup>1,2,\*</sup>, Melina Möller<sup>1,\*</sup>, Mark Zaydman<sup>3</sup>, Lu Zhao<sup>3</sup>, Zachary Beller<sup>3</sup>, Sebastian Becker<sup>1</sup>, Nadine Ritter<sup>1,4</sup>, Panpan Hou<sup>3</sup>, Jingyi Shi<sup>3</sup>, Jon Silva<sup>3</sup>, Eva Wrobel<sup>1</sup>, Nathalie Strutz-Seebohm<sup>1</sup>, Niels Decher<sup>5</sup>, Nicole Schmitt<sup>6</sup>, Sven G. Meuth<sup>7</sup>, Martina Düfer<sup>2,4</sup>, Bernhard Wünsch<sup>2,4</sup>, Jianmin Cui<sup>3</sup> and Guiscard Seebohm<sup>1,4,π</sup>

<sup>1</sup>*Institute for Genetics of Heart Diseases (IfGH), Department of Cardiovascular Medicine, University Hospital Münster, D-48149 Münster, Germany.*

<sup>2</sup>*Institute of Pharmaceutical and Medicinal Chemistry, University of Münster, Corrensstr. 48, Münster, D-48149, Germany.*

<sup>3</sup>*Department of Biomedical Engineering, Center for the Investigation of Membrane Excitability Disorders, Cardiac Bioelectricity and Arrhythmia Center, Washington University, St. Louis, MO 63130, United States of America.*

<sup>4</sup>*Chembion, University of Münster, D-48149 Münster, Germany.*

<sup>5</sup>*Institute of Physiology and Pathophysiology, Vegetative Physiology, Philipps-University of Marburg, Deutschhausstr. 1-2, 35037 Marburg, Germany.*

<sup>6</sup>*Department of Biomedical Sciences, University of Copenhagen, Copenhagen, Denmark.*

<sup>7</sup>*Department of Neurology, University Hospital Düsseldorf, Düsseldorf, Germany.*

\* These authors contributed equally.

π Corresponding author:  
Prof. Dr. Guiscard Seebohm  
email: guiscard.seebohm@ukmuenster.de

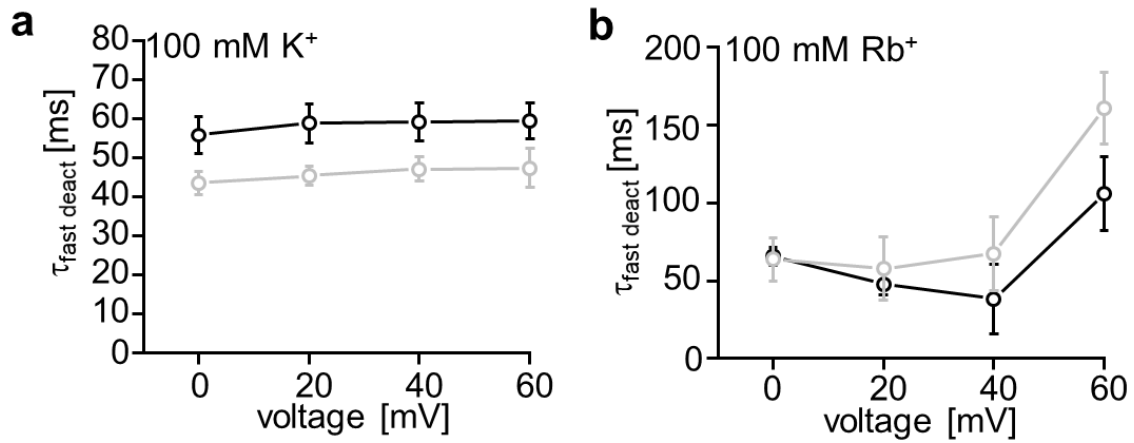

**SI Figure 1 Fast deactivation component of Kv7.1 in high K<sup>+</sup>. (a) and high Rb<sup>+</sup> (b) in absence (black) and presence (gray) of (R)-L3.** Time constants  $\tau_{\text{fast deact}}$  were determined by two-component exponential fit for each oocyte and voltage step and are given as mean  $\pm$  SEM from n=15-18 oocytes. Significance of mean differences were evaluated by one-way ANOVA and posthoc mean comparison Tukey test. However, no significant differences were observed.

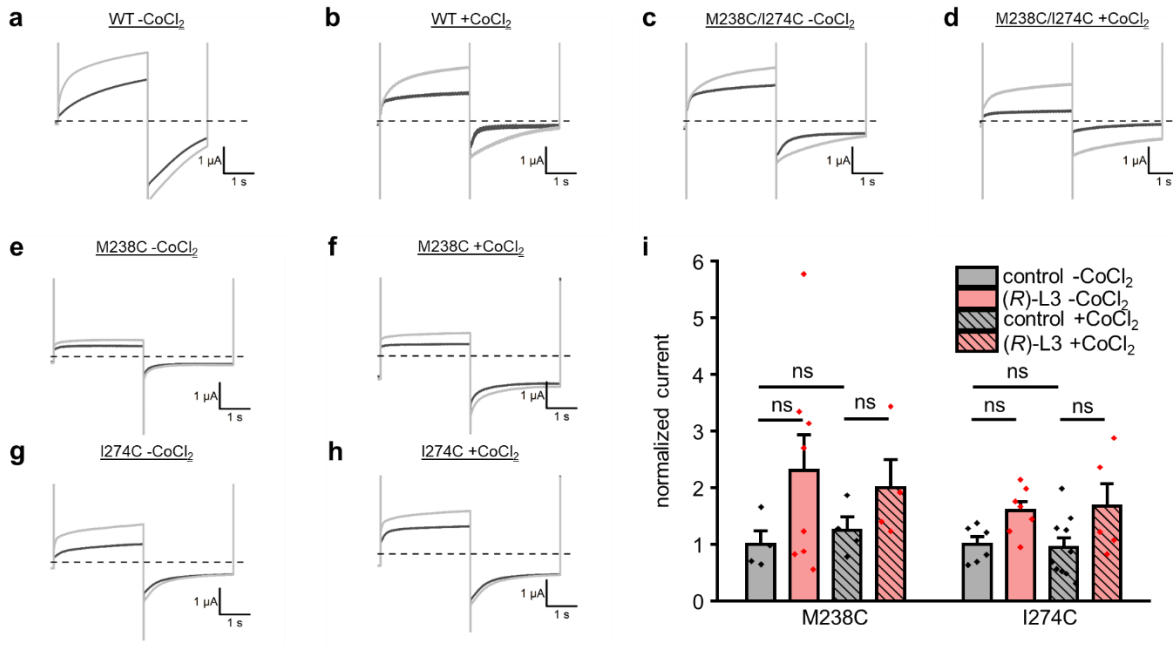

**SI Figure 2 Sample traces and normalized currents for Kv7.1 WT, Kv7.1 M238C, Kv7.1 I274C and Kv7.1 M238C/I274C in absence/presence of (R)-L3 and CoCl<sub>2</sub>.** a-h sample traces for wildtype, single and double mutants in presence (gray) and absence (black) of (R)-L3 as well as presence/absence of CoCl<sub>2</sub>. i Normalized currents of single mutants Kv7.1 M238C and Kv7.1 I274C. currents were normalized to the current of the same mutant in absence of (R)-L3 and CoCl<sub>2</sub>. Significance of mean differences were evaluated by one-way ANOVA and posthoc mean comparison Tukey test (ns for p > 0.05).

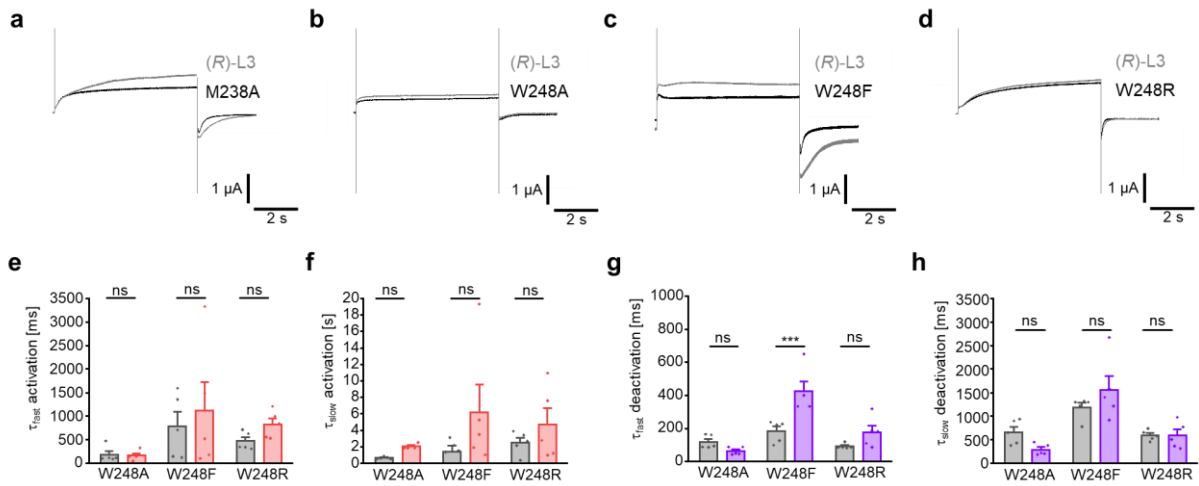

**SI Figure 3 Sample traces and kinetic parameters of W248 mutants.** **a-d.** Sample traces for  $K_v7.1$  M238A, W248A, W248F and W248R and kinetic parameters of W248 mutants. **e-h.** Time constants for fast and slow activation and deactivation. Time constants were determined by two-component exponential fit. Significance of mean differences were evaluated by one-way ANOVA and posthoc mean comparison Tukey test (ns for  $p > 0.05$ ; \*\*\* for  $p < 0.001$ ).

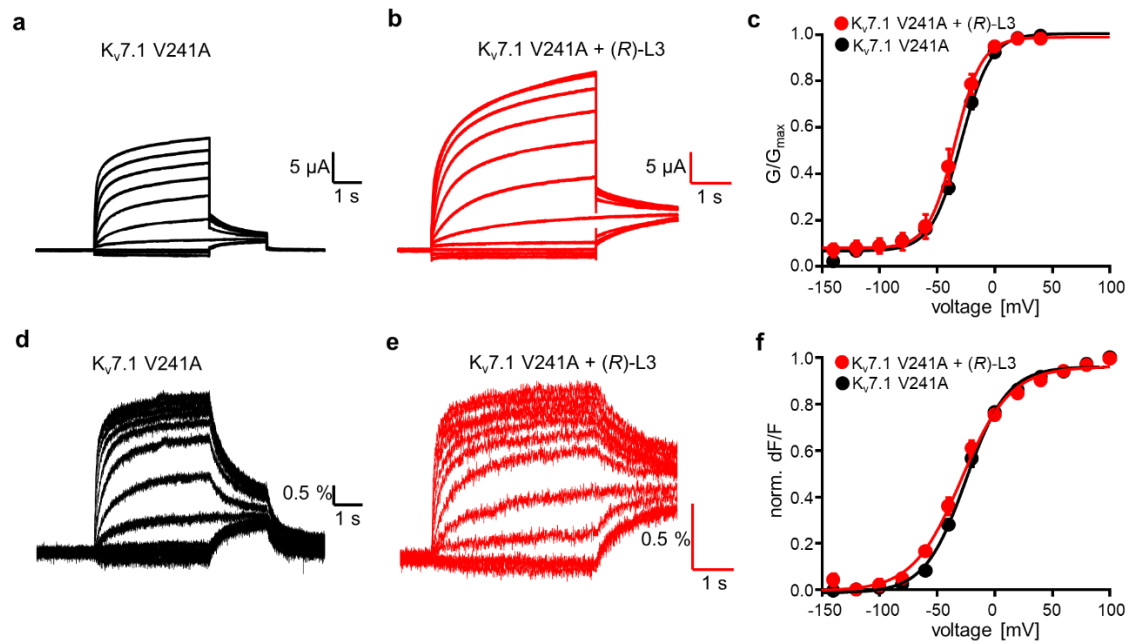

**SI Figure 4 VCF results for  $K_v7.1_{VCF}$  V241A.** **a-b** Current sample traces for  $K_v7.1_{VCF}$  V241A expressing oocytes in absence (**a**) and presence (**b**) of (R)-L3. **c**  $G/G_{max}$  relationship for  $K_v7.1_{VCF}$  V241A expressing oocytes in absence (black) and presence (red) of (R)-L3. Normalized currents were fitted by Boltzmann equation. **d-e** Fluorescence sample traces for  $K_v7.1_{VCF}$  V241A expressing oocytes in absence (**d**) and presence (**e**) of (R)-L3. **f**  $dF/F$  relationship for  $K_v7.1_{VCF}$  V241A expressing oocytes in absence (black) and presence (red) of (R)-L3. Normalized fluorescence data were fitted by Boltzmann equation.

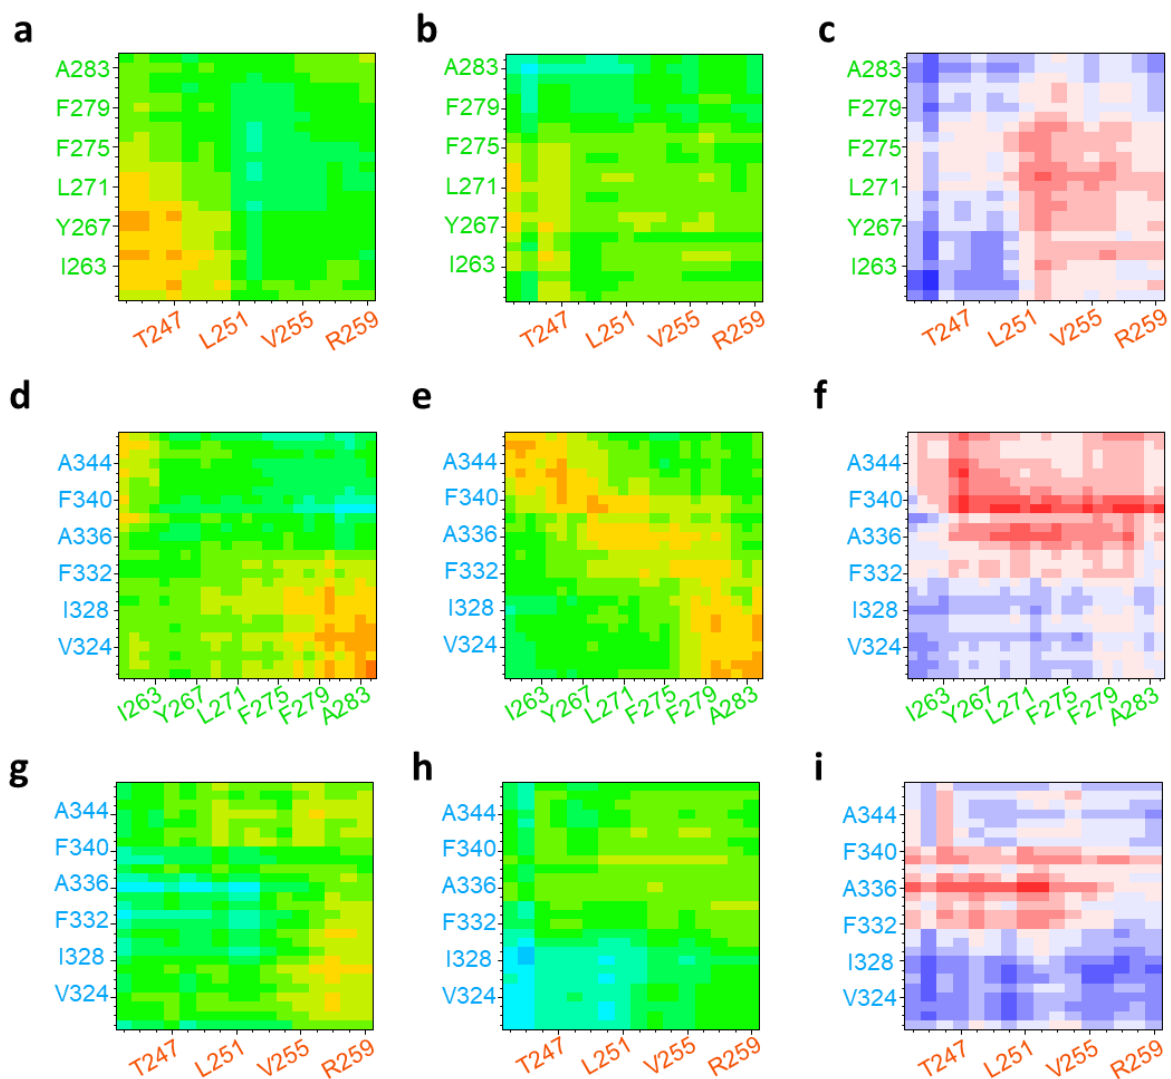

**SI Figure 5 DCCM matrices.** **a-b** Dynamic cross correlation matrix (DCCM) for S5 (Mol A, green) and S4S5 linker (Mol B, orange) in absence (**a**) and presence (**b**) of (*R*)-L3 from -1 (fully anticorrelated) over 0 (not correlated) to 1 (fully correlated). **c** Increase (positive values, red) and decrease (negative values, blue) of correlation between S5 and S4S5 linker residues depending on presence of (*R*)-L3. **d-e** DCCM for S6 (Mol A, blue) and S5 (Mol A, green) in absence (**d**) / presence (**e**) of (*R*)-L3. **f** Increase (positive values, red) and decrease (negative values, blue) of correlation between S6 and S5 residues depending on presence of (*R*)-L3. **g-h** DCCM for S6 (Mol A, blue) and S4S5 linker (Mol B, orange) in absence (**g**) / presence (**h**) of (*R*)-L3. **i** Increase (positive values, red) and decrease (negative values, blue) of correlation between S6 and S4S5 linker residues depending on presence of (*R*)-L3.

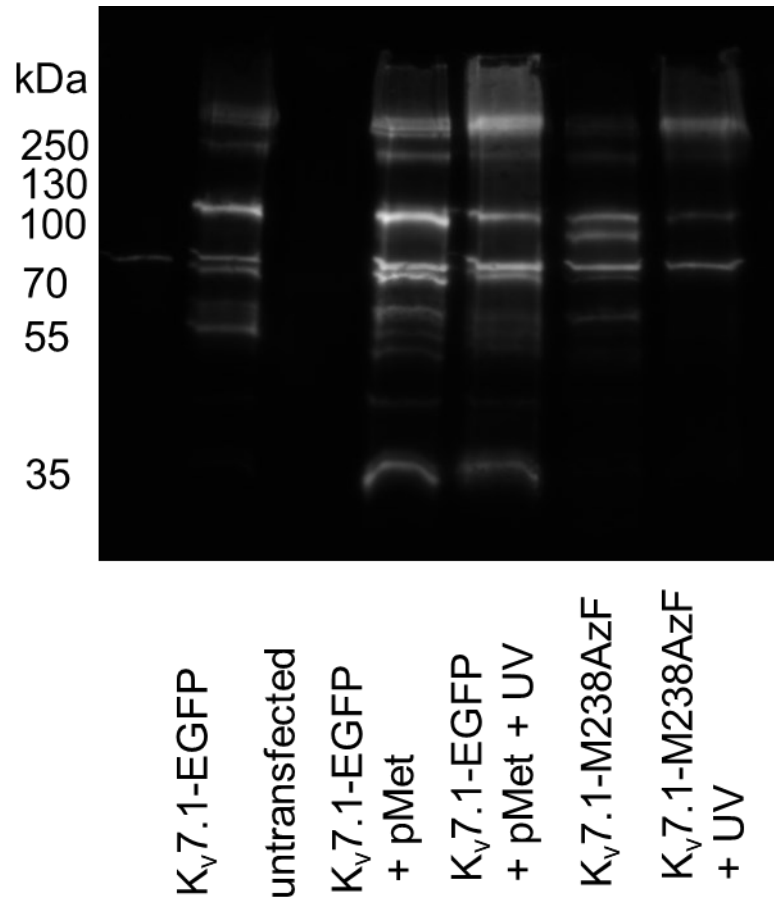

SI Figure 6 Uncropped and unedited blot image for main Figure 5e.

**SI Table 1** number of independent oocytes (n) expressing hK<sub>v</sub>7.1 variants for kinetic measurements in Figure 4 in absence/presence of (R)-L3.

| Figure | (R)-L3  | WT | I235A | L236A | R237A | M238A | L239A | H240A | V241A |
|--------|---------|----|-------|-------|-------|-------|-------|-------|-------|
| 4f     | without | 11 | 18    | 13    | -     | 14    | 11    | 14    | 13    |
|        | with    | 11 | 17    | 16    | -     | 14    | 11    | 13    | 14    |
| 4g     | without | 10 | 14    | 13    | 15    | 14    | 12    | 11    | 19    |
|        | with    | 10 | 16    | 10    | 13    | 14    | 12    | 12    | 15    |
| 4h     | without | 8  | 17    | 13    | -     | 12    | 9     | 14    | 18    |
|        | with    | 8  | 17    | 13    | -     | 12    | 9     | 12    | 18    |
| 4i     | without | 8  | 18    | 15    | 11    | 14    | 11    | 14    | 17    |
|        | with    | 8  | 15    | 11    | 12    | 14    | 11    | 11    | 17    |

**SI Table 2** number of independent oocytes (n) expressing hK<sub>v</sub>7.1 variants for Co<sup>2+</sup> crosslinking measurements in Figure 5 and SI Figure 2 in absence/presence of (R)-L3 and Co<sup>2+</sup>.

| (R)-L3         | Co <sup>2+</sup> | WT | M238C | I274C | M238C / I274C |
|----------------|------------------|----|-------|-------|---------------|
| without (ctrl) | without          | 14 | 4     | 6     | 19            |
| with           | without          | 17 | 8     | 7     | 19            |
| without (ctrl) | with             | 14 | 4     | 10    | 24            |
| with           | with             | 14 | 4     | 5     | 23            |



SI Table 3 Parameters of MD Simulations.

|                                  |                                                                                                                                           |
|----------------------------------|-------------------------------------------------------------------------------------------------------------------------------------------|
| <b>Used structures</b>           | Homology models published by Kuenze et al. <sup>[1]</sup>                                                                                 |
| <b>Box size</b>                  | AO 125.87 x 88.84 x 125.87 Å<br>AC 131.26 x 96.67 x 131.26 Å<br>RC 118.27 x 91.30 x 118.27 Å                                              |
| <b>Total number of atoms</b>     | AO 138,130 atoms + 51 for (R)-L3<br>AC 161,741 atoms + 51 for (R)-L3<br>RC 125,166 atoms + 51 for (R)-L3                                  |
| <b>Number of water molecules</b> | AO 27,073 molecules<br>AC 33,426 molecules<br>RC 25,232 molecules                                                                         |
| <b>Water model</b>               | AO TIP3P<br>AC TIP3P<br>RC TIP3P                                                                                                          |
| <b>Salt concentration</b>        | AO 0.9 % NaCl<br>AC 0.9 % NaCl<br>RC 0.9 % NaCl                                                                                           |
| <b>Number of ions</b>            | AO 182 (Na <sup>+</sup> , Cl <sup>-</sup> )<br>AC 233 (Na <sup>+</sup> , Cl <sup>-</sup> )<br>RC 166 (Na <sup>+</sup> , Cl <sup>-</sup> ) |

### Supplementary References

- [1] G. Kuenze, A. M. Duran, H. Woods, K. R. Brewer, E. F. McDonald, C. G. Vanoye, A. L. George, C. R. Sanders, J. Meiler, *PLoS One* **2019**, *14*, e0220415.
